# Supplementary material for: LncRNA ADAMTS9-AS2 inhibits gastric cancer (GC) development and sensitizes chemoresistant GC cells to cisplatin by regulating miR-223-3p/NLRP3 axis
Source: publisher site journal article supplement (doi:10.18632/aging.103314), 2020-06-09
Supplement: Supplementary file [file aging-v12i11-103314-supplementary-material-SD1.pdf]

SUPPLEMENTARY FIGURE

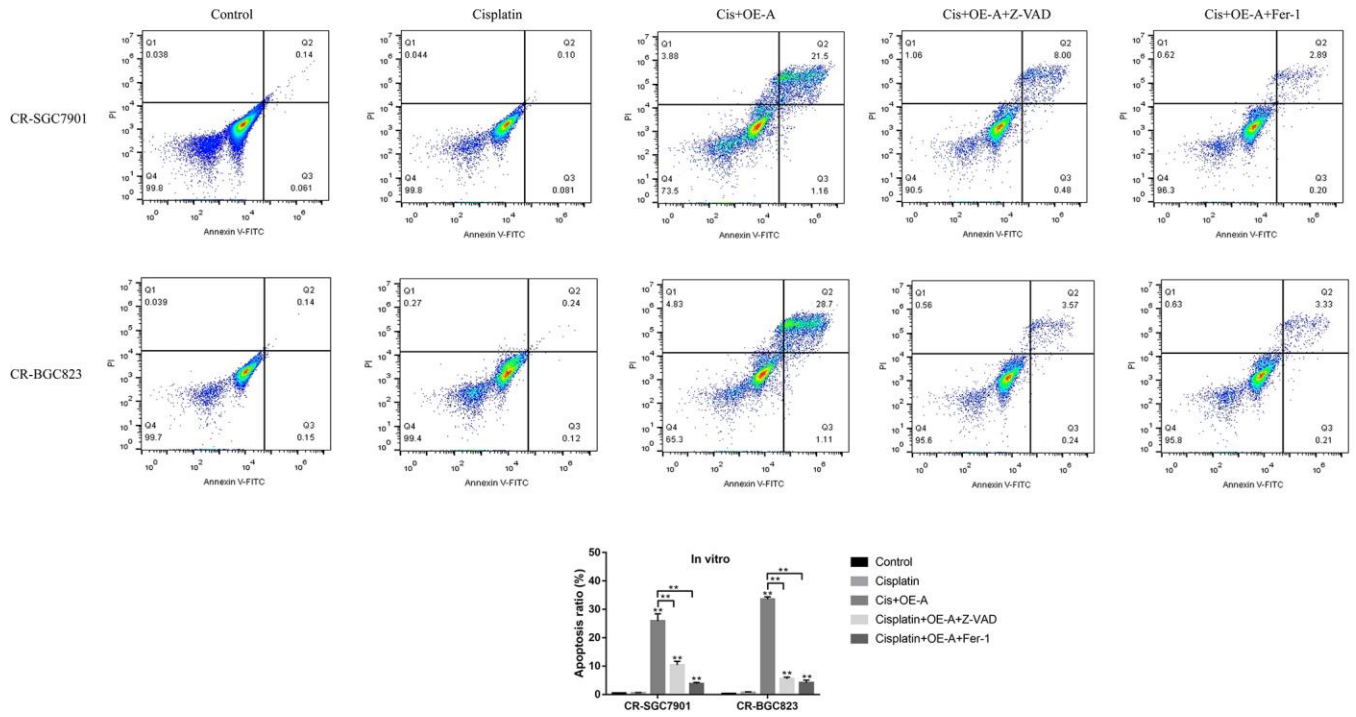

**Supplementary Figure 1. FCM assay was performed to detect cell apoptosis ratio.** The cells were stained with PI and Annexin V-FITC, and cell apoptosis was measured by FCM. **\*\*P < 0.01.**
